# Supplementary material for: Crystal-by-Crystal Assembly in Two Types of Periodically Banded Aggregates of Poly(p-Dioxanone)
Source: MDPI journal article supplement (doi:10.3390/polym15020393), 2023-01-11
Supplement: s1 [file s1]

---

## Supporting Information

### Crystal-by-Crystal Assembly in Two Types of Periodically Banded Aggregates of Poly(p-dioxanone)

Kuan-Ying Huang<sup>1</sup>, Yu-Zhe Huang<sup>1</sup>, Li-Ting Lee<sup>2</sup> and Eamor M. Woo<sup>1</sup>

<sup>1</sup> Department of Chemical Engineering, National Cheng Kung University  
No. 1, University Road, Tainan, 701-01, Taiwan

<sup>2</sup> Department of Materials Science and Engineering, Feng Chia University, Taichung, 407-24, Taiwan.  
Correspondence: [emwoo@mail.ncku.edu.tw](mailto:emwoo@mail.ncku.edu.tw); Tel.: +886 6 275-7575 x 62670.

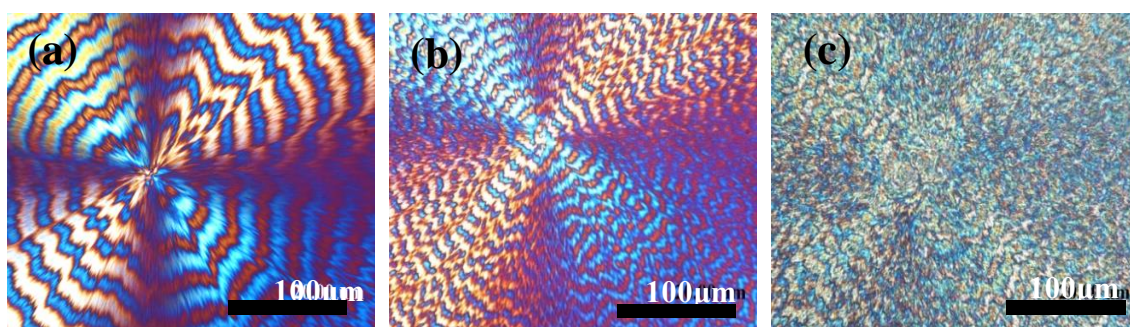

**Figure S1.** POM graphs of PPDO crystallized at higher  $T_c$ : (a) 80 oC, (b) 85, (c) 90 oC, showing increasingly corrupted bands with lesser regularity. Two types of bands disappear at high  $T_c$ .

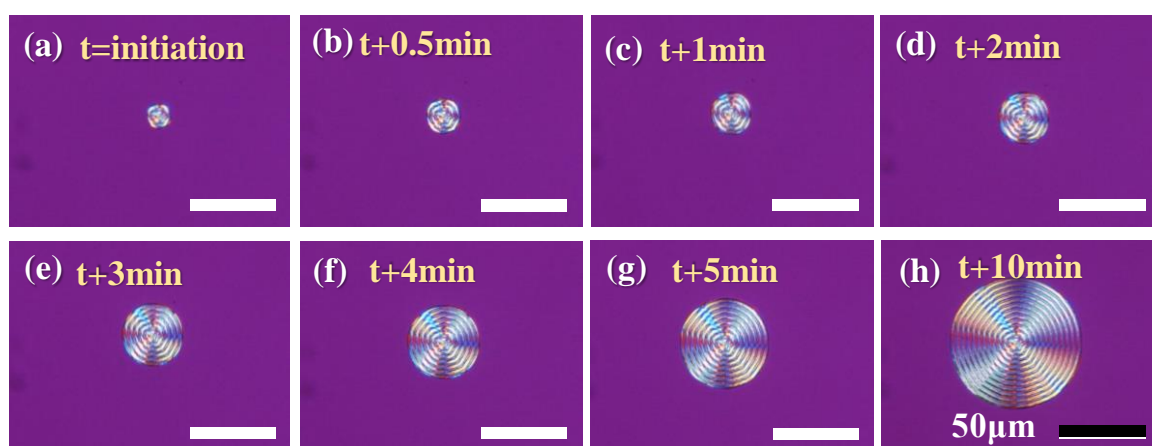

**Figure S2.** (a)-(h) In-situ POM graphs of PPDO captured at  $T_c = 76^{\circ}\text{C}$  at different times (0.5 – 10 min) of crystallization by quenching from  $T_{\text{max}} = 150^{\circ}\text{C}$ . (max. melt temp. from which specimens were rapidly quenched to isothermal  $T_c$ ).

---

| $T_c$ | Type-p no. % | Type-n no. % |
|-------|--------------|--------------|
| 70    | 75           | 25           |
| 72    | 72.7         | 27.3         |
| 74    | 65.4         | 34.6         |
| 76    | 96           | 4            |
| 78    | 75           | 25           |

**Table S1.** Variation of number fractions of Type-p and Type-n spherulites of PPDO at increasing  $T_c$  = 70 °C, 72 °C, 74 °C, 76 °C, and 78 °C. (Type-n no. % = 100% - (Type-p no. %)).

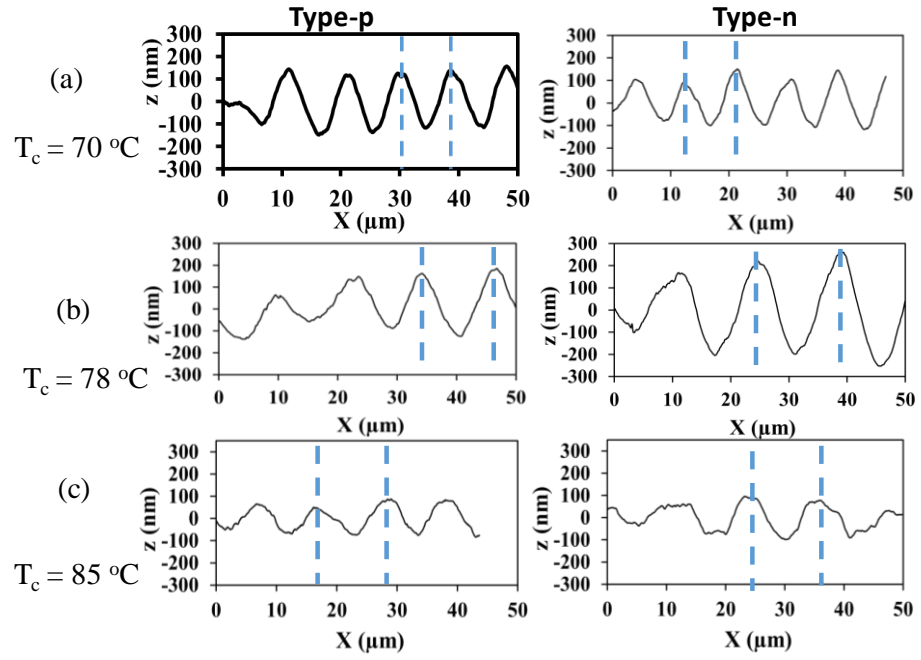

**Figure S3.** AFM height profiles of Type-p and Type-n of PPDO crystallized at various  $T_c$ : (a) 70 °C, (b) 78 °C, (c) 85 °C.
